# Supplementary material for: High quality metabolomic data for Chlamydomonas reinhardtii
Source: PubMed Central journal article supplement (PMC2377246; doi:10.1186/1746-4811-4-7), 2008-04-28
Supplement: 1746-4811-4-7-S1.pdf [file 1746-4811-4-7-S1.pdf]

| Metabolite                      | Cell leakage | Signal intensity |
|---------------------------------|--------------|------------------|
| 1,2,4-benzenetriol              | 6.2%         | 14997            |
| 1-hexadecanol                   | <5%          | 7509             |
| 1-monostearin                   | <5%          | 8510             |
| 2-isopropylmalic acid           | <5%          | 11177            |
| 2-monopalmitin                  | <5%          | 4535             |
| 3-phosphoglycerate              | <5%          | 164233           |
| 5'-deoxy-5'-methylthioadenosine | <5%          | 11898            |
| adenine                         | <5%          | 25719            |
| adenosine                       | <5%          | 15094            |
| adenosine-5-monophosphate       | <5%          | 31175            |
| alanine                         | <5%          | 20549            |
| $\alpha$ -ketoglutaric acid     | <5%          | 18884            |
| arabinose                       | <5%          | 8765             |
| arginine + ornithine            | 14.5%        | 24534            |
| asparagine                      | <5%          | 6960             |
| aspartic acid                   | 6.9%         | 22632            |
| beta alanine                    | <5%          | 37329            |
| capric acid                     | <5%          | 88763            |
| cellobiose                      | <5%          | 1944             |
| cholesterol                     | 5.4%         | 10804            |
| citric acid                     | <5%          | 29347            |
| cytidine-5'-diphosphate deriv.  | <5%          | 60109            |
| dehydroascorbate                | 7.5%         | 3368             |
| elaidic acid                    | <5%          | 31011            |
| fructose                        | 6.4%         | 2152             |
| fructose-6-phosphate            | 8.8%         | 3628             |
| fumaric acid                    | <5%          | 74735            |
| galactose                       | 15.9%        | 12410            |
| galactose-6-phosphate           | 9.8%         | 1289             |
| glucose-6-phosphate             | 7.1%         | 6817             |
| glutamic acid                   | 9.7%         | 47472            |
| glyceric acid                   | <5%          | 14250            |
| glycerol                        | 9.9%         | 148326           |
| glycerol- $\alpha$ -phosphate   | <5%          | 1150504          |
| glycerol- $\beta$ -phosphate    | <5%          | 32132            |
| glycine                         | 8.8%         | 222323           |
| guanine                         | <5%          | 16517            |
| guanosine                       | <5%          | 786850           |
| heptadecanoic acid              | 5.3%         | 25013            |
| icosenoic acid                  | <5%          | 18040            |
| inositol myo-                   | 13.7%        | 14571            |

| Metabolite               | Cell leakage | Signal intensity |
|--------------------------|--------------|------------------|
| inositol-4-monophosphate | <5%          | 139384           |
| isoleucine               | 16.9%        | 47759            |
| lauric acid              | 5.1%         | 153882           |
| leucrose                 | <5%          | 15011            |
| linoleic acid            | <5%          | 35074            |
| linolenic acid           | <5%          | 296829           |
| lysine                   | <5%          | 220806           |
| malate                   | 7.1%         | 76200            |
| maltotriose              | <5%          | 47154            |
| methionine               | <5%          | 10102            |
| methionine sulfoxide     | 5.1%         | 6541             |
| 1-monopalmitin           | <5%          | 10606            |
| myristic acid            | 5.8%         | 28001            |
| octadecanol              | <5%          | 6740             |
| oleic acid               | <5%          | 26038            |
| palmitic acid            | <5%          | 395453           |
| palmitoleic acid         | 8.3%         | 39788            |
| pantothenic acid         | <5%          | 5168             |
| pelargonic acid          | <5%          | 194072           |
| pentadecanoic acid       | 8.5%         | 15358            |
| phenylalanine            | 11.5%        | 34765            |
| phytol                   | <5%          | 754448           |
| previtamin D3            | <5%          | 46128            |
| proline                  | 24.1%        | 35284            |
| pseudo uridine           | 6.8%         | 8629             |
| putrescine               | 18.6%        | 1227790          |
| ribose-5-phosphate       | <5%          | 1029             |
| serine                   | 11.7%        | 165431           |
| stearic acid             | <5%          | 871127           |
| sucrose                  | 21.6%        | 4002             |
| threitol                 | <5%          | 5316             |
| threonine                | 9.7%         | 67334            |
| tocopherol               | <5%          | 42873            |
| trehalose                | 14.2%        | 2204             |
| tyrosine                 | 7.1%         | 38841            |
| urea                     | <5%          | 59696            |
| xylitol                  | 5.7%         | 3871             |

**Metabolite specific cellular leakage rates.** These rates were determined when using quenching solvents containing 35% methanol (v/v) in comparison to media blanks and media after quenching. Signal intensities in counts-per-second of the time-of-flight mass spectrometer are given using the quantification ions as in the annotation result downloads at [32].
